# Supplementary material for: Potato spindle tuber viroid infection triggers degradation of chloride channel protein CLC-b-like and Ribosomal protein S3a-like mRNAs in tomato plants
Source: PubMed Central journal article supplement (PMC5566334; doi:10.1038/s41598-017-08823-z), 2017-08-21
Supplement: 41598_2017_8823_MOESM1_ESM.pdf [file 41598_2017_8823_MOESM1_ESM.pdf]

## Supplemental information

### ***Potato spindle tuber viroid infection triggers degradation of chloride channel protein CLC-b-like and Ribosomal protein S3a-like mRNAs in tomato plants***

Charith Raj Adkar-Purushothama<sup>1\*</sup>, Pavithran Sridharan Iyer<sup>2</sup> and Jean-Pierre Perreault<sup>1\*</sup>

<sup>1</sup>RNA Group/Groupe ARN, Département de Biochimie, Faculté de médecine des sciences de la santé, Pavillon de Recherche Appliquée au Cancer, Université de Sherbrooke, 3201 rue JeanMignault, Sherbrooke, Québec, J1E 4K8, Canada

<sup>2</sup>Département de Physique, Université de Sherbrooke, 2500 Boulevard de l'Université Sherbrooke, Québec, J1K 2R1, Canada.

\*Corresponding authors

E-mails: charith.adkar@USherbrooke.ca (CRA)

Jean-Pierre.Perreault@USherbrooke.ca (JPP)

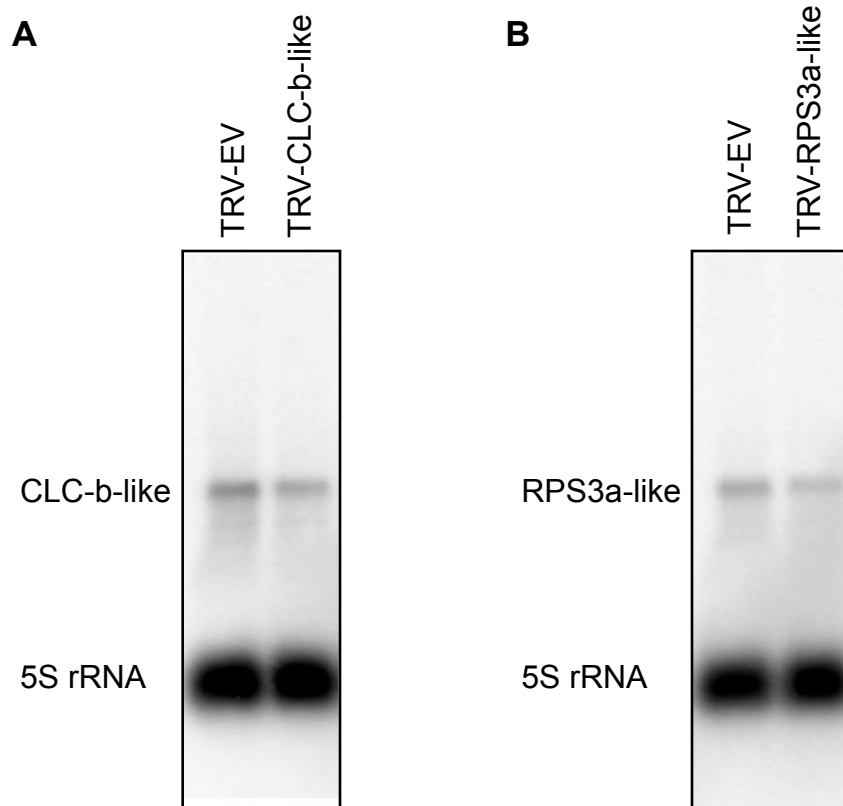

**Fig S1: VIGS mediated knock-down of chloride channel protein CLC-b-like mRNA and the 40S ribosomal protein S3a-like mRNA.**

The tomato plants were subjected to a knock-down assay by a VIGS technique using the TRV1 vector in combination with either the TRV2 empty vector, or with its derivatives. After 18-days post infiltration, total RNA extracted from the agroinfiltrated plants were analyzed by gel blot assay for the knock-down/suppression of (A) *Chloride channel CLC-b-like* and, (B) *RPS3a-like* mRNAs using gene specific radiolabeled probes. The 5S rRNA was used as a loading control.

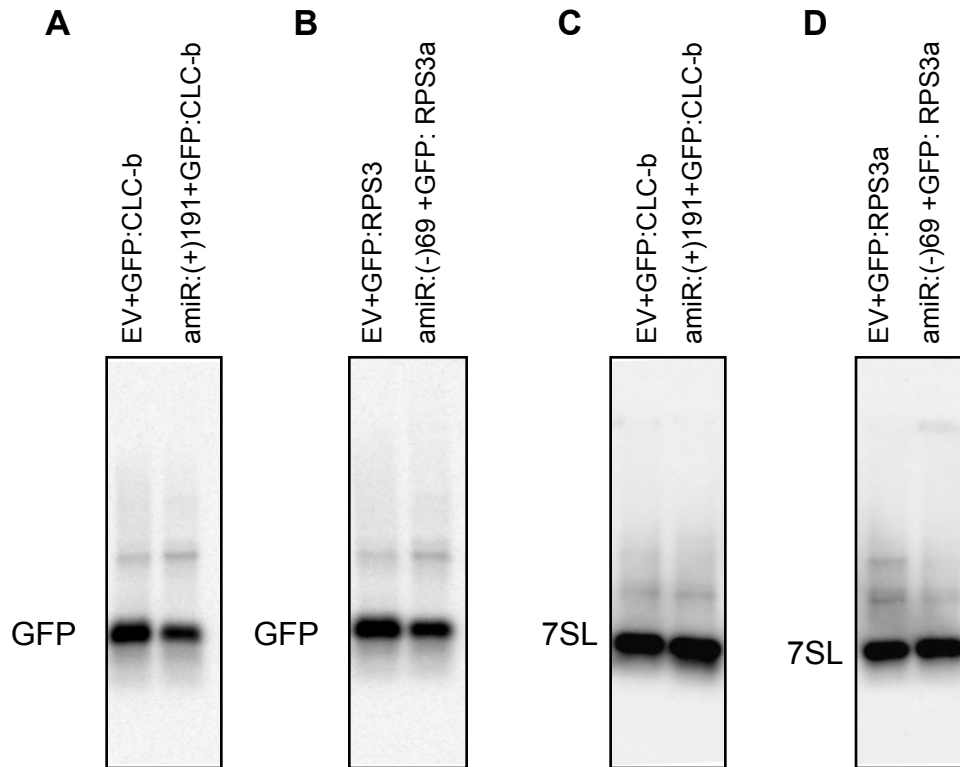

**Figure S2: Validation of the reduction in the amount of GFP-mRNA in the various vd-sRNA:amiRNA plus GFP:target combinations.**

*N. benthamiana* leaves were agro-infiltrated with empty pBIN61 vector (EV) plus GFP:CLCb; amiR:(+)191 plus GFP:CLCb; EV plus GFP:RPS3a; and, amiR:(-)69 plus GFP:RPS3a. At 3-dpi, total RNA extracts were subjected to RNA gel blot analyses with either (A) and (B) GFP or (C) and (D) 7SL radiolabeled probes.

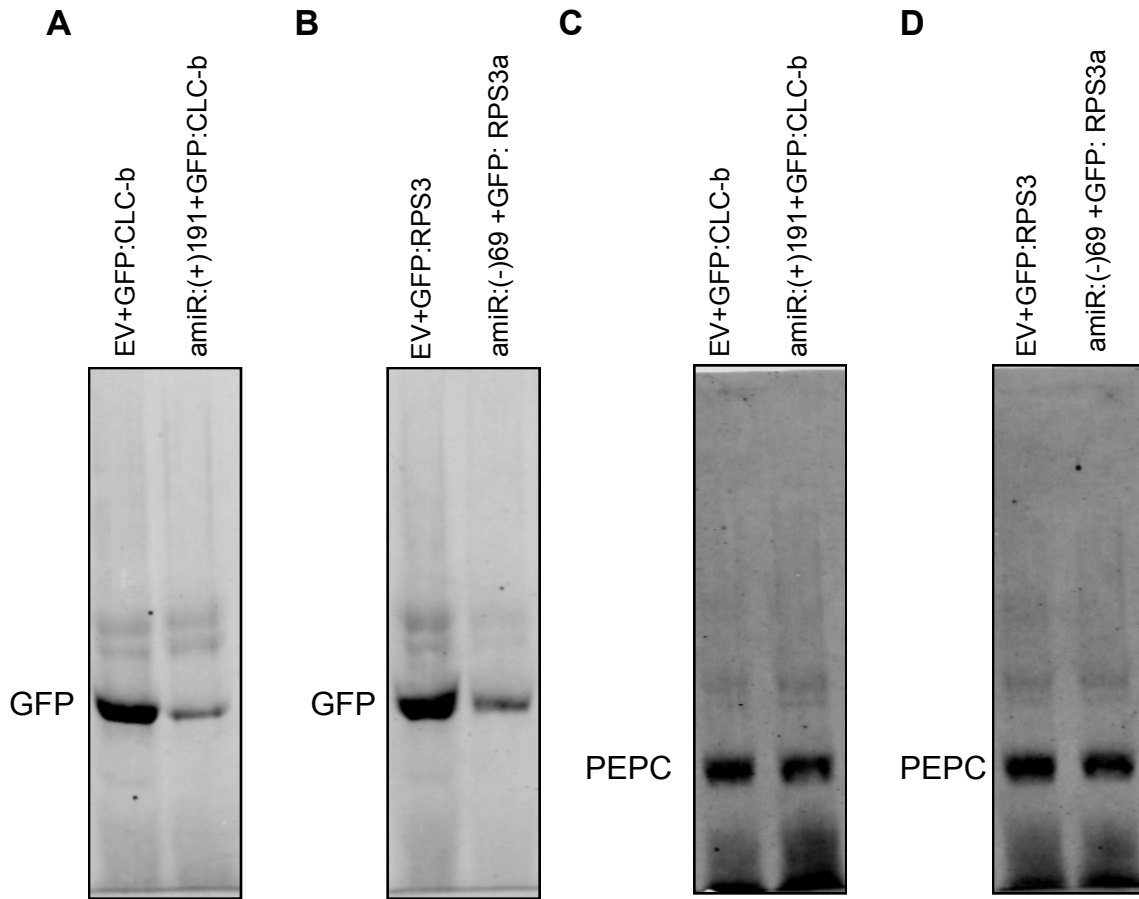

**Figure S3: Validation of the translational repression of GFP-mRNA in the various vd-sRNA:amiRNA plus GFP:target combinations.**

*N. benthamiana* leaves were agro-infiltrated with empty pBIN61 vector (EV) plus GFP:CLCb; amiR:(+)191 plus GFP:CLCb; EV plus GFP:RPS3a; and, amiR:(-)69 plus GFP:RPS3a. At 3 dpi, total protein extracts were subjected to immunoblotting with anti-GFP (A and B) and anti-PEPC (C and D) antibodies.
